# Supplementary material
Source: Research Square preprint supplement (doi:10.21203/rs.3.rs-9929710/v1)
Supplement: Supplementary file 1 [file 6d2e3f131c685a1737bb28ce.docx]

**Supplementary Table 1: Specialty preferences and factors influencing specialty preference**

| **Specialty** | **Overall: n,%** | **Female: n,%** | **Male: n,%** | **Chi-Squared** |
| --- | --- | --- | --- | --- |
| Surgery and subspecialties | 160, 40% | 78, 33.5% | 82, 49% | (X2(1)=9.26, p=0.002, Z=3.14, p<0.001); Males were more likely to choose Surgery and its subspecialties |
| Internal Medicine and subspecialties | 152, 38% | 80, 34.3% | 72, 43% | (X2(1)=2.82, p=0.093) |
| Pediatrics and subspecialties | 112, 28% | 75, 32.2% | 37, 22% | (X2(4)=4.37, p=0.036, Z=2.2, p=0.028); Females were more likely to choose Pediatrics |
| Obstetrics & Gynecology | 73, 18.3% | 58, 24.9% | 15, 8.9% | (X2(1)=15.46, p<0.001, Z=4.06, p<0.001); Females were more likely to choose Obstetrics & Gynecology |
| Anesthesiology | 25, 6.3% | 13, 5.6% | 12, 7.2% | (X2(1)=0.2, p=0.656) |
| Family Medicine | 49, 12.3% | 34, 14.6% | 15, 8.9% | (X2(1)=2.35, p=0.125) |
| Psychiatry | 51, 12.8% | 34, 14.6% | 17, 10.2% | (X2(1)=1.32, p=0.249) |
| Ophthalmology | 80, 20% | 58, 24.9% | 22, 13.2% | (X2(1)=7.63, p<0.001, Z=2.89, p<0.001); Females were more likely to choose Ophthalmology |
| Pathology | 24, 6% | 11, 4.7% | 13, 7.8% | (X2(1)=1.12, p=0.29) |
| Radiology | 64, 16% | 38, 16.3% | 26, 15.6% | (X2(1)=0.004, p=0.952) |
| Dermatology | 93, 23.3% | 69, 29.6% | 24, 14.4% | (X2(1)=11.83, p<0.001, Z=3.55, p<0.001); Females were more likely to choose Dermatology |
| Emergency Medicine | 55, 13.8% | 27, 11.6% | 28, 16.8% | (X2(1)=1.78, p=0.181) |
| Not Sure | 49, 12.3% | 36, 15.4% | 13, 7.8% | (X2(1)=4.63, p=0.031, Z=2.3, p=0.021); Females were more likely to be unsure |
| Factors Influencing Specialty | Overall: n,% | Female: n,% | Male: n,% | Chi-Squared |
| Work-Life Balance | 254, 63.5% | 157, 67.4% | 97, 58% | (X2(1)=3.24, p=0.072) |
| Income Potential | 179, 44.8% | 92, 39.5% | 87, 52% | (X2(1)=5.76, p=0.016, Z=2.5, p=0.012); Males were more likely to choose based on income potential |
| Gender Representation | 65, 16.3% | 51, 21.9% | 14, 8.4% | (X2(1)=12.06, p<0.001, Z=3.6, p<0.001); Females were more likely to choose based on gender representation |
| Workplace Environment | 160, 40% | 96, 41.2% | 64, 38% | (X2(1)=0.23, p=0.634) |
| Social Acceptability for your Gender in the field | 46, 11.5% | 22, 9.4% | 24, 14.4% | (X2(1)=1.86, p=0.172) |
| Prestige & Recognition | 53, 13.3% | 22, 9.4% | 31, 18.6 | (X2(1)=6.27, p=0.012, Z=2.65, p=0.008); Males were more likely to choose work-life prestige |
| Intellectual Challenge | 78, 19.5% | 36, 15.4% | 42, 25% | (X2(1)=5.23, p=0.022, Z=2.41, p=0.016); Males were more likely to choose based on intellectual challenge |
| Passion for the field | 259, 64.8% | 154, 66% | 105, 62.9% | (X2(1)=0.31, p=0.576) |
| Mentor Influence | 58, 14.5% | 30, 12.9% | 28, 16.8% | (X2(1)=0.89, p=0.344) |
| Flexible Working Hours | 133, 33.3% | 87, 37.3% | 46, 27.5% | (X2(1)=3.77, p=0.052) |
| Previous Clinical Exposure | 99, 24.8% | 59, 25.3% | 40, 24% | (X2(1)=0.038, p=0.845) |
| Family Expectations | 37, 9.3% | 25, 10.7% | 12, 7% | (X2(1)=1.06, p=0.302) |
